# Supplementary material
Source: publisher figshare collection journal article supplement (https://tandf.figshare.com/ndownloader/files/12379490)
Supplement: Supplementary file 1 [file 12379490]

Supporting Information

Microtubules play an essential role in the survival of primary acute lymphoblastic leukemia cells advancing through G1 phase

Magdalena Delgado and Timothy C. Chambers

List of contents: Figures S1-S3 with legends


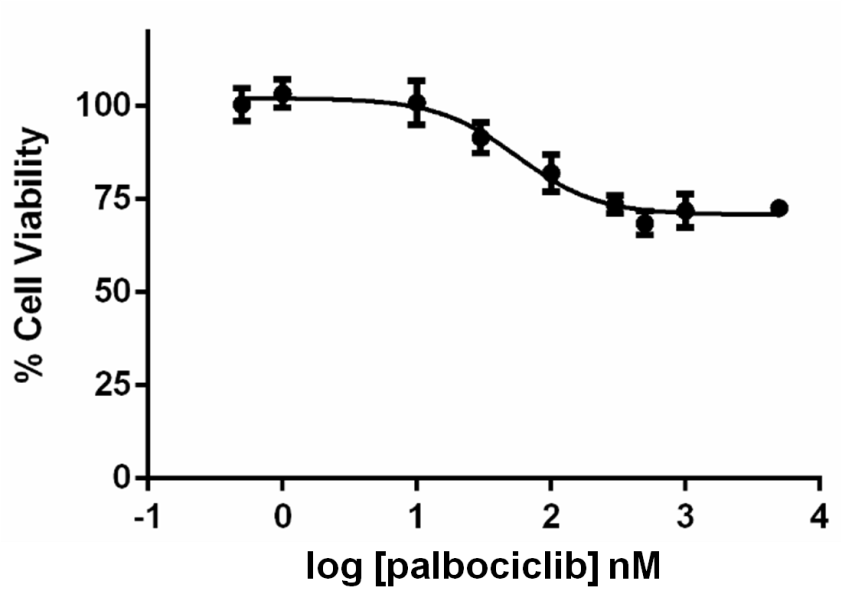


**Figure S1. Sensitivity of primary ALL-5 cells to palbociclib (PCB**). Cell viability was assessed by MTT assay as described in Experimental Procedures. Cells were treated with vehicle (100% viability) or increasing concentrations of PCB for 120 h. Results are given as mean ± S. D. (n = 6).

**
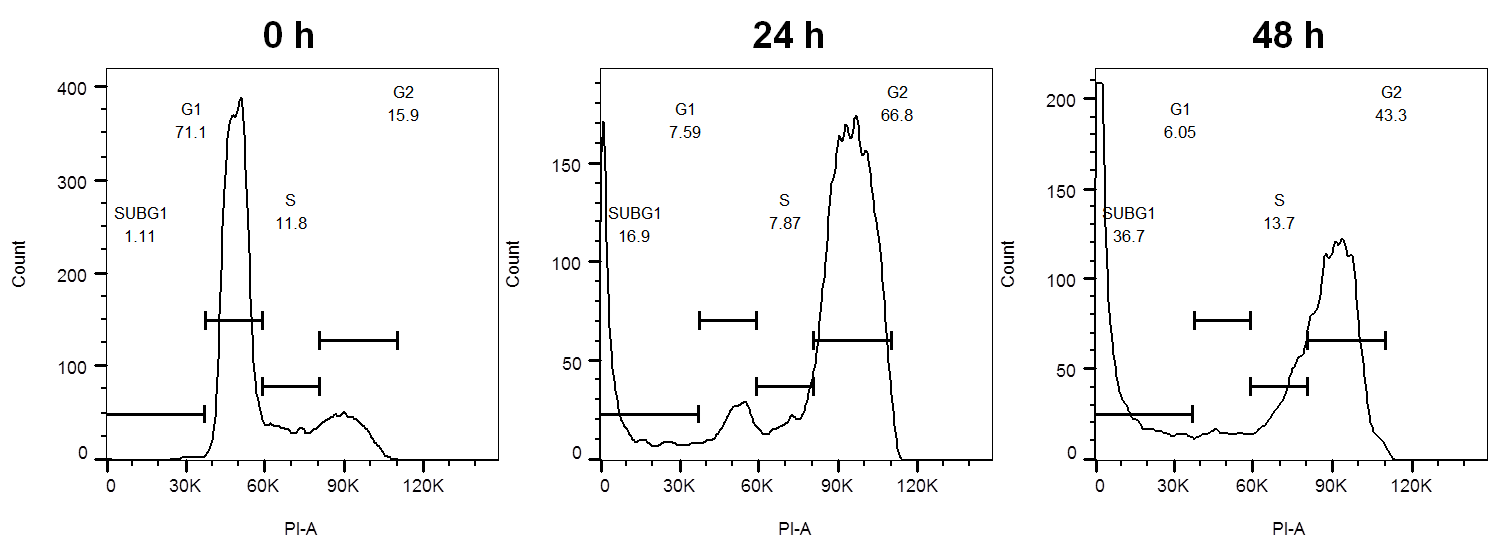
**

**Figure S2. Vincristine (VCR) induces mitotic arrest in T98G cells.** T98G cells were treated with 1 μM VCR for the times indicated and analyzed for DNA content by propidium iodide staining and flow cytometry as described in Experimental Procedures. Data shown are representative of six experiments.


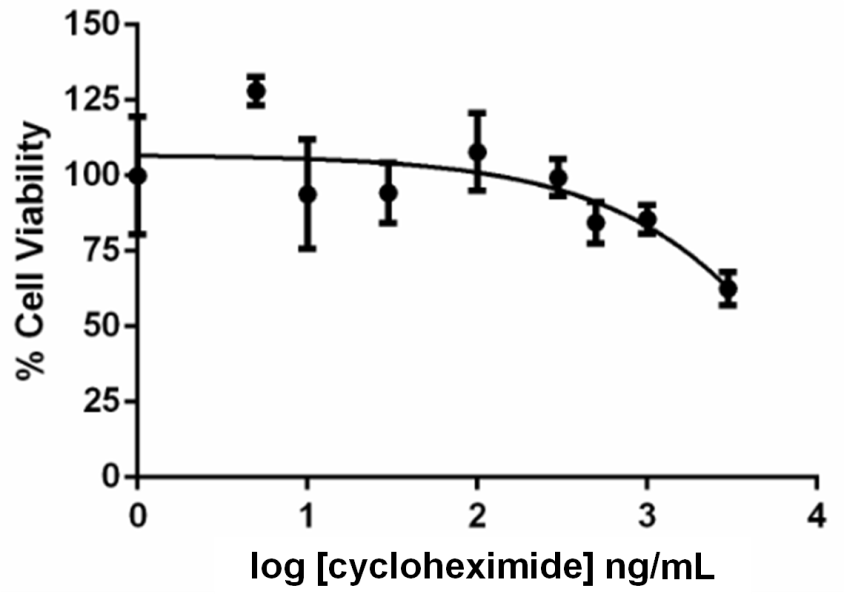


**Figure S3. Sensitivity of primary ALL-5 cells to cycloheximide (CHX).** Cell viability was assessed by MTT assay as described in Experimental Procedures. Cells were treated with vehicle (100% viability) or increasing concentrations of CHX for 48 h. Results are given as mean ± S. D. (n = 6).
